# Supplementary material
Source: PubMed Central journal article supplement (PMC3911234)
Supplement: AEM.03133-13_zam999105083so1.pdf [file AEM.03133-13_zam999105083so1.pdf]

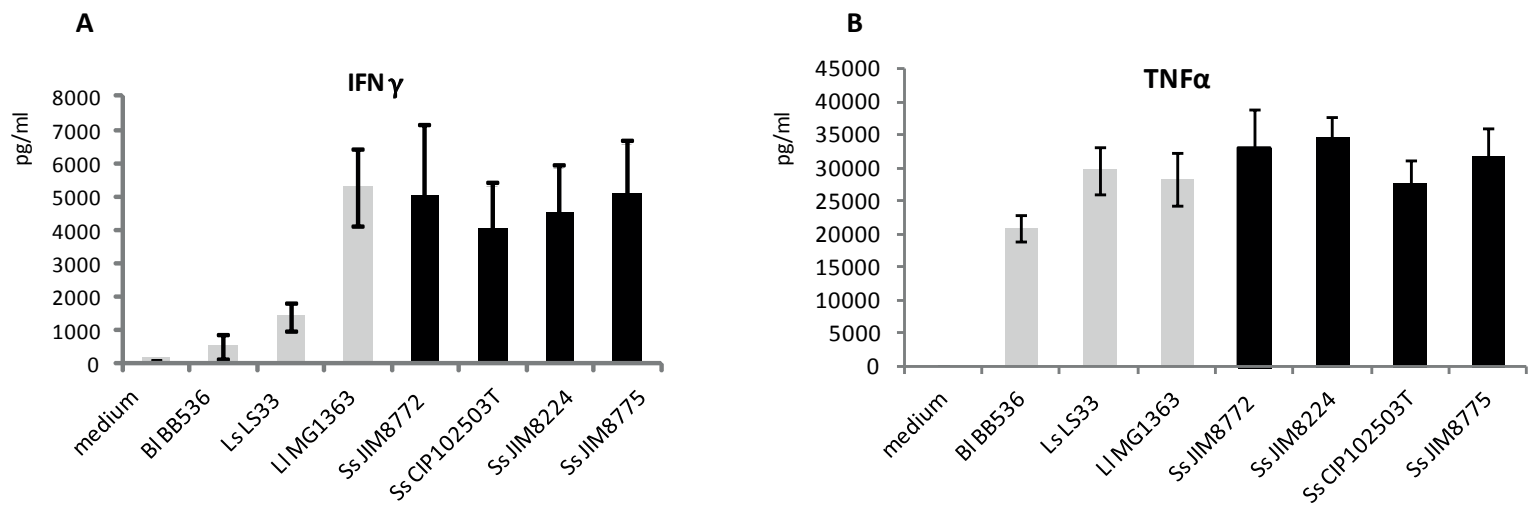

FIG. S1. Comparative pro-inflammatory IFN $\gamma$  (A) and TNF $\alpha$  (B) cytokine responses of human PBMC stimulated with bacterial reference strains and *S. salivarius* strains for 24h. Immunocompetent cells were stimulated by bacteria for 24h with a multiplicity level of infection of 10 and collected supernatants were analyzed by ELISA. Data are expressed in pg/ml as means and standard deviations of results for four distinct healthy blood donors.
